# Supplementary material for: The impact of peppermint oil on the irritable bowel syndrome: a meta-analysis of the pooled clinical data
Source: PubMed Central journal article supplement (PMC6337770; doi:10.1186/s12906-018-2409-0), 2019-01-17
Supplement: 12906_2018_2409_MOESM2_ESM.pdf [file 12906_2018_2409_MOESM2_ESM.pdf]

## **Additional File 2. Table of Excluded studies.**

1. Cross-over design without a washout period, non-validated inclusion criteria, insufficient data.(1)
  2. Cross-overdesign without a washout period, non-validated inclusion criteria.(2)
  3. Cross-over design without a washout period, non-validated inclusion criteria.(3)
  4. Insufficient data as subjects used rescue therapy without disclosing details. (4)
  5. Cross-over design with a variable washout period, Insufficient data (conference abstract).(5)
  6. Data presented elsewhere.(6)
  7. Data presented elsewhere.(7)
  8. Data presented elsewhere.(8)
  9. Data presented elsewhere.(9)
  10. Data presented elsewhere.(10)
- 
1. Evans B. Multicentre trial of peppermint oil capsules in irritable bowel syndrome.[abstract]. *Scand-J-Gastroenterol*; 1982:503.
  2. Lawson MJ, Knight RE, Tran K, Walker G, Robertsthomson IC. Failure of Enteric-Coated Peppermint Oil in the Irritable Bowel Syndrome - a Randomized, Double-Blind Crossover Study. *Journal of Gastroenterology and Hepatology*. 1988;3(3):235-8.
  3. Nash P, Gould SR, Bernardo DE. Peppermint oil does not relieve the pain of irritable bowel syndrome. *Br J Clin Pract*. 1986;40(7):292-3.
  4. Vejdani R, Shalmani HRM, Mir-Fattahi M, Sajed-Nia F, Abdollahi M, Zali MR, et al. The efficacy of an herbal medicine, Carmint, on the relief of abdominal pain and bloating in patients with irritable bowel syndrome: A pilot study. *Digestive Diseases and Sciences*. 2006;51(8):1501-7.
  5. Rhodes J, Evans BK, Rees WDW. Peppermint oil in enteric coated capsules for the treatment of irritable bowel syndrome: A double blind controlled trial. *Hepato-Gastroenterology*. 1980;27(SUPPL.):E31.6.
  6. Cash BD, Epstein MS, Shah S. Successful Management Viscerosensory Symptoms in Patients With IBS-M and IBS-D Using a Targeted Delivery System of Peppermint Oil (PO-SST). *American Journal of Gastroenterology*. 2015;110:S745-S.
  7. Epstein MS, Cash BD, Shah S. Rapid relief of irritable bowel syndrome (IBS) symptoms with targeted delivery of l-menthol to the small intestine: Results from 2 clinical trials and a patient survey. *American Journal of Gastroenterology*. 2015;110:S741.
  8. Cash B, Epstein M, Shah S. Ibgard, a novel small intestine targeted delivery system of peppermint oil, results in significant improvement in severe and unbearable IBS symptom intensity. Results from a US based, 4-week, randomized, placebo-controlled, multi-center IBSRESTTM trial. *Gastroenterology*; 2015:S489.
  9. Cash BD, Epstein MS, Shah SM. Ibgard (R), a Novel Targeted Delivery System of Peppermint Oil, Results in Significant Improvement in the Total IBS Symptom Score and Individual IBS Symptoms. Results From the US Based, 4-Week, Randomized, Placebo Controlled, Multi-Centered Ibsrest (TM) Trial. *Gastroenterology*. 2015;148(4):S662-S3.
  10. Cappello G, Spezzaferro M, Coraggio D, Grossi L, Marzio L. Peppermint oil (Mintoil (R)) in the treatment of irritable bowel syndrome: A prospective double blind placebo controlled randomized trial. *Gastroenterology*. 2006;130(4):A322-A3.
